# Supplementary material for: Characterization and third order non-linear optical properties study of the MXene/PVA composite nanofibers
Source: Research Square preprint supplement (doi:10.21203/rs.3.rs-7912159/v1), 2025-12-16
Supplement: Supplementary file 1 [file e2abbfe92c795e22c04ba1e1.docx]

SUPPLEMENTARY INFORMATION

**Characterization and third order non-linear optical properties study of the MXene/PVA composite nanofibers**

Shermineh Galehdarvand, Hossein Mahmoudi Chenari*


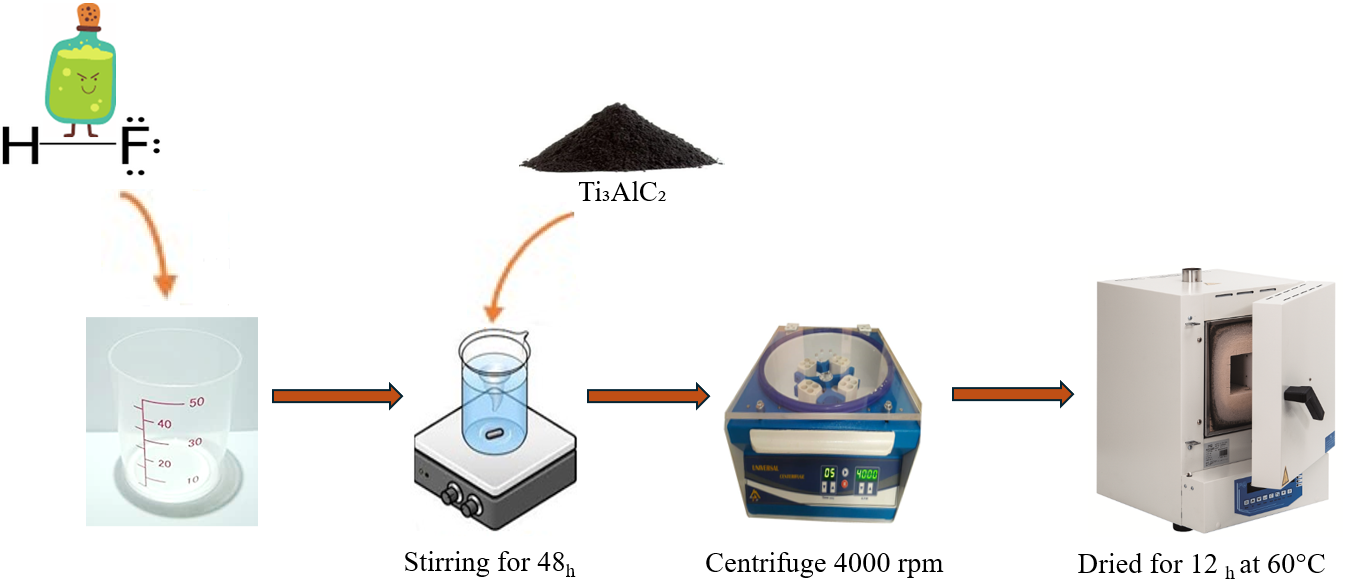


Supplementary **Fig.1.** Schematic of the MXene synthesis process.


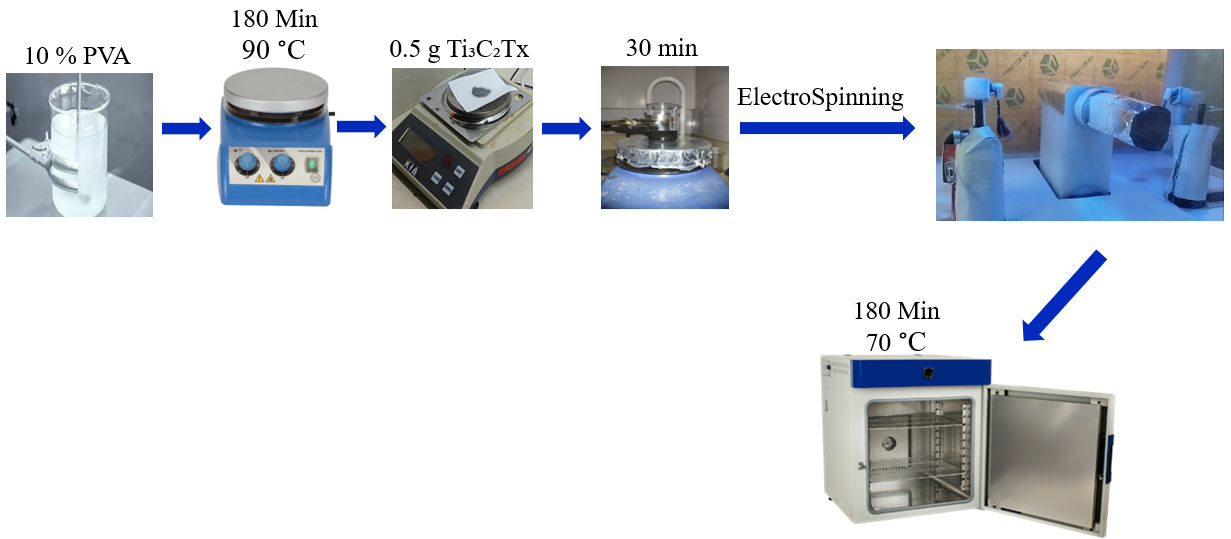


Supplementary **Fig.2.** Schematic of Mxene/PVA nanofiber fabrication


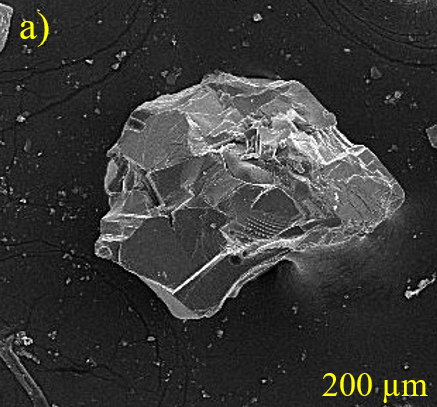


Supplementary Fig. 4(a). FESEM images at different magnification of Ti₃AlC₂ at 200 μm


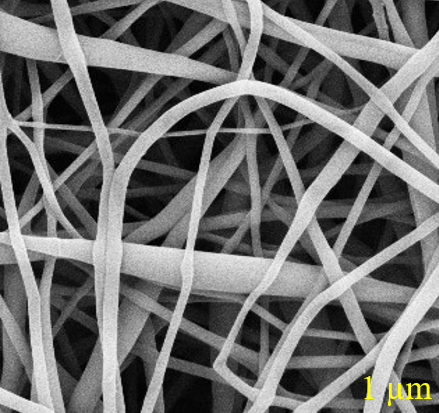


Supplementary **Fig.5.** FESEM images at different magnification of MXene/PVA nanofibers.
